# Supplementary material for: B–H⋯π and C–H⋯π interactions in protein–ligand complexes: carbonic anhydrase II inhibition by carborane sulfonamides
Source: Royal Society of Chemistry journal article supplement (doi:10.1039/d2cp04673c), 2023-01-01
Supplement: d2cp04673c1.pdf [file d2cp04673c1.pdf]

## Supplementary material for

# B–H $\cdots\pi$ and C–H $\cdots\pi$ Interactions in Protein–Ligand Complexes: Carbonic Anhydrase II Inhibition by Carborane Sulfonamides

*Jindřich Fanfrlík,<sup>1\*†</sup> Jiří Brynda,<sup>1‡</sup> Michael Kugler,<sup>1</sup> Martin Lepšík,<sup>1</sup> Klára Pospíšilová,<sup>1</sup> Josef Holub,<sup>2</sup> Drahomír Hnyk,<sup>2</sup> Jan Nekvinda,<sup>2</sup> Bohumír Gruner,<sup>2</sup> Pavlína Řezáčová<sup>1\*</sup>*

<sup>1</sup> Institute of Organic Chemistry and Biochemistry of the Czech Academy of Sciences, Flemingovo nám. 2, 166 10, Prague 6, Czech Republic

<sup>2</sup> Institute of Inorganic Chemistry, Czech Academy of Sciences, 250 68 Husinec-Řež, Czech Republic

## Results

**Table S1:** Diffraction data processing and refinement statistics.

| <b>CAII in complex with</b>              |                                   |                                   |
|------------------------------------------|-----------------------------------|-----------------------------------|
|                                          | <b>2</b>                          | <b>3</b>                          |
| <b>Data collection statistics</b>        |                                   |                                   |
| Wavelength (Å)                           | 0.91841                           | 0.91841                           |
| Space group                              | $P2_1$                            | $P2_1$                            |
| Cell parameters (Å,<br>°)                | 42.4 41.6 72.5<br>90.0 104.3 90.0 | 42.3 41.7 72.4<br>90.0 104.3 90.0 |
| Resolution range (Å)                     | 50-1.09 (1.22-1.15)               | 50.0-1.15 (1.22-1.15)             |
| Number of unique reflection              | 86327 (13506)                     | 86320 (13658)                     |
| Multiplicity                             | 3.6(3.5)                          | 6.3 (5.9)                         |
| Completeness (%)                         | 98.4 (95.8)                       | 98.8 (97.3)                       |
| $R_{\text{merge}}^a$                     | 0.044 (1.07)                      | 0.052 (1.12)                      |
| $CC_{(1/2)} (%)$                         | 99.9 (53.0)                       | 99.9 (63.2)                       |
| Average $I/\sigma(I)$                    | 12.5 (1.2)                        | 14.3 (1.33)                       |
| Wilson B (Å <sup>2</sup> ) <sub>q</sub>  | 18.7                              | 18.8                              |
| <b>Refinement statistics</b>             |                                   |                                   |
| Resolution range (Å)                     | 40.9-1.09 (1.18-1.15)             | 41.0-1.15 (1.18-1.15)             |
| No. of reflection in working set         | 83156(6102)                       | 81812 (5987)                      |
| No. of reflection in the test set        | 2098(146)                         | 4306 (315)                        |
| $R_{\text{work}}$ value (%) <sup>b</sup> | 16.1 (38.0)                       | 15.3 (27.1)                       |
| $R_{\text{free}}$ value (%) <sup>c</sup> | 18.0 (40.8)                       | 18.3 (25.7)                       |
| RMSD bond length (Å)                     | 0.010                             | 0.010                             |
| RMSD angle (°)                           | 1.6                               | 1.7                               |
| Mean ADP value (Å <sup>2</sup> )         | 21.2                              | 19.1                              |
| <b>Ramachandran plot statistics</b>      |                                   |                                   |
| Residues in favored regions (%)          | 96.1                              | 96.5                              |
| Residues in allowed regions (%)          | 3.9                               | 3.5                               |
| PDB code                                 | 8AA6                              | 8AAE                              |

The data in parentheses refer to the highest-resolution shell.

<sup>a</sup>  $R_{\text{merge}} = (|I_{\text{hkl}} - \langle I \rangle|)/I_{\text{hkl}}$ , where the average intensity  $\langle I \rangle$  is taken over all symmetry equivalent measurements and  $I_{\text{hkl}}$  is the measured intensity for any given reflection.

<sup>b</sup>  $R\text{-value} = ||F_o| - |F_c||/|F_o|$ , where  $F_o$  and  $F_c$  are the observed and calculated structure factors, respectively.

<sup>c</sup>  $R_{\text{free}}$  is equivalent to the R-value but is calculated for 5% of the reflections chosen at random and omitted from the refinement process.

**Figure S1. 1** (A), 2 (B) and 3 (C) OMIT difference maps displaying the inhibitor electron density calculated with a 3 sigma cutoff.

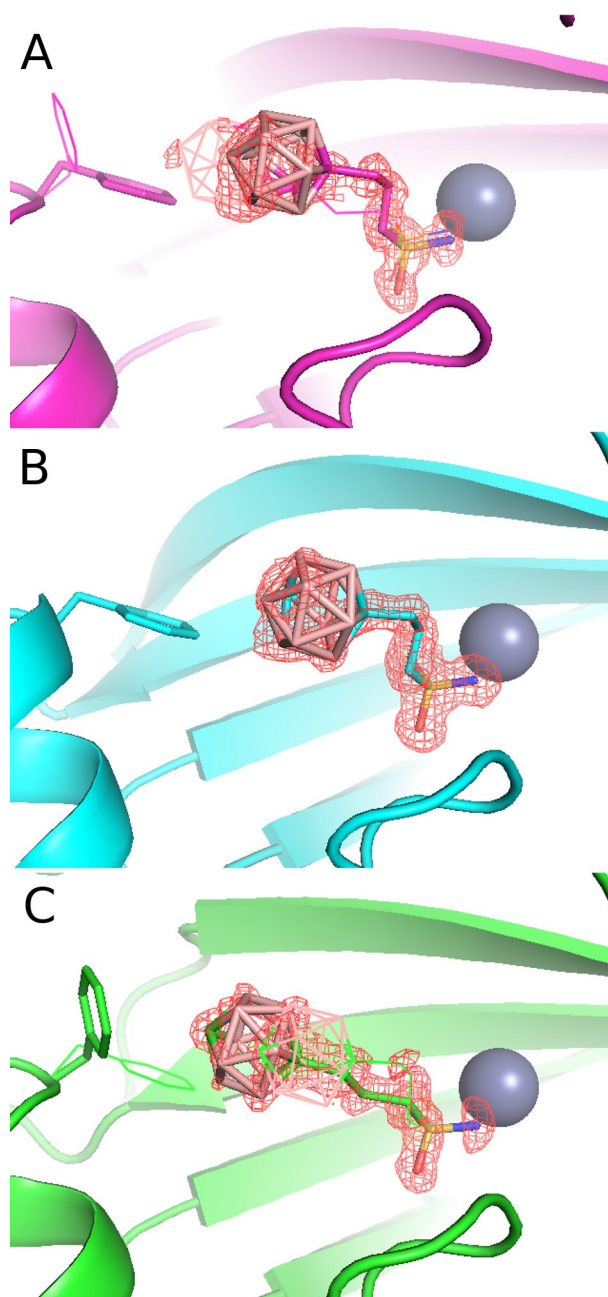

*Molecular modeling.* The **1** inhibitor is bound in two alternative conformations (pose I and II). Moreover *ortho* carborane of **1** has five rotamers that are distinguished only by the positions of the BH and CH groups. All rotamers were modeled and their stabilities are shown in Table S2.

**Table S2.** Relative ‘free’ energies of **1**:CA II in kcal mol<sup>-1</sup>. The dihedral angle ( $\phi$ ) of 0 degrees corresponds to the C position in the X-ray structure.

| Orientation | $\phi$ | $\Delta G'$ |
|-------------|--------|-------------|
| I           | -144   | 1.9         |
|             | -72    | 2.8         |
|             | 0      | 4.7         |
|             | 72     | 5.2         |
|             | 144    | 2.0         |
| II          | -144   | 2.8         |
|             | -72    | 0.0         |
|             | 0      | 1.0         |
|             | 72     | 4.2         |
|             | +144   | 4.0         |

Inhibitor **2** is only bound in a single conformation (Pose I). Position of the CH vertex in the crystal structure agrees with position of the most stable rotamer in the QM/MM model (see Table S3).

**Table S3.** Relative ‘free’ energies of **2**:CA II in kcal/mol. The dihedral angle ( $\phi$ ) of 0 degrees corresponds to the C position in the X-ray structure.

| $\phi$ | $\Delta G'$ |
|--------|-------------|
| -144   | 1.4         |
| -72    | 1.6         |
| 0      | 0.0         |
| +72    | 3.1         |
| +144   | 2.2         |
